# Supplementary material for: Identification of Potential Treatments for Acute Lymphoblastic Leukemia through Integrated Genomic Network Analysis
Source: MDPI journal article supplement (doi:10.3390/ph15121562), 2022-12-14
Supplement: s1 [file s1]

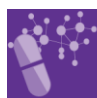

# Identification of Potential Treatments for Acute Lymphoblastic Leukemia through Integrated Genomic Network Analysis

Zulfan Zazuli <sup>1,\*</sup>, Lalu Muhammad Irham <sup>2</sup>, Wirawan Adikusuma <sup>3</sup> and Nur Melani Sari <sup>4</sup>

**Citation:** Zazuli, Z.; Irham, L.M.; Adikusuma, W.; Sari, N.M. Identification of Potential Treatments for Acute Lymphoblastic Leukemia through Integrated Genomic Network Analysis. *Pharmaceuticals* **2022**, *15*, 1562. <https://doi.org/10.3390/ph15121562>

Academic Editors: Stefania Crucitta, Gloria Ravegnini and Rossana Roncato

Received: 18 October 2022

Accepted: 5 December 2022

Published: 14 December 2022

**Publisher's Note:** MDPI stays neutral with regard to jurisdictional claims in published maps and institutional affiliations.

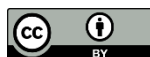

**Copyright:** © 2022 by the authors. Licensee MDPI, Basel, Switzerland. This article is an open access article distributed under the terms and conditions of the Creative Commons Attribution (CC BY) license (<https://creativecommons.org/licenses/by/4.0/>).

<sup>1</sup> Department of Pharmacology-Clinical Pharmacy, School of Pharmacy, Bandung Institute of Technology, Bandung 40132, Indonesia

<sup>2</sup> Faculty of Pharmacy, Universitas Ahmad Dahlan, Yogyakarta 55166, Indonesia

<sup>3</sup> Department of Pharmacy, Faculty of Health Science, University of Muhammadiyah Mataram, Mataram 83115, Indonesia

<sup>4</sup> Division of Hematology-Oncology, Department of Child Health, Faculty of Medicine, Universitas Padjadjaran/Dr. Hasan Sadikin General Hospital, Bandung 40161, Indonesia

\* Correspondence: [zulfan@itb.ac.id](mailto:zulfan@itb.ac.id); Tel.: +62-222504852

**Abstract:** The advancement of high-throughput sequencing and genomic analysis revealed that acute lymphoblastic leukemia (ALL) is a genetically heterogeneous disease. The abundance of such genetic data in ALL can also be utilized to identify potential targets for drug discovery and even drug repurposing. We aimed to determine potential genes for drug development and further guide the identification of candidate drugs repurposed for treating ALL through integrated genomic network analysis. Genetic variants associated with ALL were retrieved from the GWAS Catalog. We further applied a genomic-driven drug repurposing approach based on the six functional annotations to prioritize crucial biological ALL-related genes based on the scoring system. Lastly, we identified the potential drugs in which the mechanisms overlapped with the therapeutic targets and prioritized the candidate drugs using Connectivity Map (CMap) analysis. Forty-two genes were considered biological ALL-risk genes with *ARID5B* topping the list. Based on potentially druggable genes that we identified, palbociclib, sirolimus, and tacrolimus were under clinical trial for ALL. Additionally, chlorprothixene, sirolimus, dihydroergocristine, papaverine, and tamoxifen are the top five drug repositioning candidates for ALL according to the CMap score with dasatinib as a comparator. In conclusion, this study determines the practicability and the potential of integrated genomic network analysis in driving drug discovery in ALL.

**Keywords:** acute lymphoblastic leukemia; bioinformatics; leukemia; drug repurposing; genetic variants; genomic network analysis

**Table S1. ALL risk-associated SNPs generated from GWAS Catalog**

| Variant and risk allele | P-value                | P-value annotation                       | RAF  | OR        | Beta | CI          | Mapped gene | Reported trait                                               | Location    |
|-------------------------|------------------------|------------------------------------------|------|-----------|------|-------------|-------------|--------------------------------------------------------------|-------------|
| rs282708- <b>A</b>      | 5 x 10 <sup>-6</sup>   | (ETV6-RUNX1 positive, Northern European) | 0.4  | '-        | '-   | '-          | '-          | Acute lymphoblastic leukemia (childhood)                     | 4:58637561  |
| rs7738636- <b>A</b>     | 6 x 10 <sup>-6</sup>   |                                          | 0.76 | 1.2658228 | '-   | [1.15-1.41] | '-          | Acute lymphoblastic leukemia (childhood)                     | 6:77080091  |
| rs282708- <b>A</b>      | 8 x 10 <sup>-6</sup>   |                                          | 0.41 | 1.23      | '-   | [1.12-1.35] | '-          | Acute lymphoblastic leukemia (childhood)                     | 4:58637561  |
| rs11638062- <b>?</b>    | 3 x 10 <sup>-7</sup>   |                                          | '-   | 1.8       | '-   | [1.44-2.25] | AGBL1       | Acute lymphoblastic leukemia                                 | 15:86620033 |
| rs11638062- <b>?</b>    | 5 x 10 <sup>-6</sup>   |                                          | NR   | 2.53      | '-   | [1.70-3.77] | AGBL1       | Acute lymphoblastic leukemia (adult)                         | 15:86620033 |
| rs6901152- <b>T</b>     | 5 x 10 <sup>-6</sup>   | (ETV6-RUNX1 positive, Northern European) | 0.43 | '-        | '-   | '-          | AIG1        | Acute lymphoblastic leukemia (childhood)                     | 6:143337875 |
| rs10821936- <b>C</b>    | 1 x 10 <sup>-106</sup> |                                          | 0.33 | 1.8       | '-   | [1.71-1.89] | ARID5B      | B-cell acute lymphoblastic leukaemia                         | 10:61963818 |
| rs7089424- <b>?</b>     | 2 x 10 <sup>-73</sup>  |                                          | NR   | 1.8867927 | '-   | [0.50-0.57] | ARID5B      | Acute lymphoblastic leukemia in childhood (B cell precursor) | 10:61992400 |
| rs7089424- <b>T</b>     | 2 x 10 <sup>-62</sup>  |                                          | NR   | 1.64      | '-   | [NR]        | ARID5B      | Acute lymphoblastic leukemia (childhood)                     | 10:61992400 |
| rs7090445- <b>?</b>     | 5 x 10 <sup>-54</sup>  |                                          | NR   | '-        | '-   | '-          | ARID5B      | Acute lymphoblastic leukemia (B-cell precursor)              | 10:61961417 |

| Variant and risk allele | P-value               | P-value annotation    | RAF  | OR   | Beta | CI            | Mapped gene | Reported trait                                               | Location    |
|-------------------------|-----------------------|-----------------------|------|------|------|---------------|-------------|--------------------------------------------------------------|-------------|
| rs10821936- <b>C</b>    | 6 x 10 <sup>-46</sup> |                       | 0.33 | 1.86 | '-   | [1.71-2.03]   | ARID5B      | Acute lymphoblastic leukemia (childhood)                     | 10:61963818 |
| rs7089424- <b>C</b>     | 7 x 10 <sup>-19</sup> |                       | 0.34 | 1.65 | '-   | [1.54-1.76]   | ARID5B      | Acute lymphoblastic leukemia (childhood)                     | 10:61992400 |
| rs10821936- <b>C</b>    | 1 x 10 <sup>-15</sup> |                       | 0.34 | 1.91 | '-   | [1.60-2.20]   | ARID5B      | Acute lymphoblastic leukemia (childhood)                     | 10:61963818 |
| rs10821936- <b>C</b>    | 4 x 10 <sup>-15</sup> |                       | 0.31 | 1.46 | '-   | [1.33 - 1.60] | ARID5B      | Acute lymphoblastic leukemia (childhood)                     | 10:61963818 |
| rs7090445- <b>?</b>     | 3 x 10 <sup>-14</sup> |                       | NR   | 1.96 | '-   | [1.60-2.24]   | ARID5B      | Acute lymphoblastic leukemia (childhood)                     | 10:61961417 |
| rs10821936- <b>C</b>    | 1 x 10 <sup>-11</sup> | (ETV6-RUNX1 positive) | 0.31 | 1.42 | '-   | [1.29 - 1.58] | ARID5B      | Acute lymphoblastic leukemia (childhood)                     | 10:61963818 |
| rs4245595- <b>C</b>     | 2 x 10 <sup>-9</sup>  |                       | 0.34 | 1.63 | '-   | [1.38–1.93]   | ARID5B      | Acute lymphoblastic leukemia (childhood)                     | 10:61963136 |
| rs10821936- <b>C</b>    | 2 x 10 <sup>-8</sup>  |                       | 0.73 | 2.31 | '-   | [1.70-3.14]   | ARID5B      | Acute lymphoblastic leukemia (childhood)                     | 10:61963818 |
| rs4617118- <b>G</b>     | 2 x 10 <sup>-12</sup> |                       | NR   | 1.28 | '-   | [1.19-1.37]   | CCDC26      | Acute lymphoblastic leukemia (childhood)                     | 8:129143897 |
| rs75777619- <b>G</b>    | 2 x 10 <sup>-9</sup>  |                       | 0.12 | 1.26 | '-   | [1.17-1.36]   | CCDC26      | B-cell acute lymphoblastic leukaemia                         | 8:129172930 |
| rs28665337- <b>?</b>    | 4 x 10 <sup>-9</sup>  |                       | 0.12 | 1.34 | '-   | [1.21-1.47]   | CCDC26      | Acute lymphoblastic leukemia in childhood (B cell precursor) | 8:129181858 |
| rs113650570- <b>A</b>   | 8 x 10 <sup>-35</sup> |                       | 0.02 | 2.32 | '-   | [2.03-2.65]   | CDKN2A      | B-cell acute lymphoblastic leukaemia                         | 9:21976403  |

| Variant and risk allele                | P-value               | P-value annotation                       | RAF  | OR        | Beta | CI             | Mapped gene        | Reported trait                                               | Location    |
|----------------------------------------|-----------------------|------------------------------------------|------|-----------|------|----------------|--------------------|--------------------------------------------------------------|-------------|
| rs3731249- <b>&lt;b&gt;?&lt;/b&gt;</b> | 1 x 10 <sup>-27</sup> |                                          | NR   | 2.65      | '-   | [2.22-3.17]    | CDKN2A             | Acute lymphoblastic leukemia in childhood (B cell precursor) | 9:21970917  |
| rs3731217- <b>&lt;b&gt;?&lt;/b&gt;</b> | 7 x 10 <sup>-14</sup> |                                          | NR   | 1.4285715 | '-   | [0.64-0.77]    | CDKN2A             | Acute lymphoblastic leukemia in childhood (B cell precursor) | 9:21984662  |
| rs3731217- <b>&lt;b&gt;?&lt;/b&gt;</b> | 2 x 10 <sup>-8</sup>  |                                          | NR   | '-        | '-   | '-             | CDKN2A             | Acute lymphoblastic leukemia (B-cell precursor)              | 9:21984662  |
| rs2069426- <b>&lt;b&gt;A&lt;/b&gt;</b> | 4 x 10 <sup>-9</sup>  |                                          | NR   | 1.35      | '-   | [NR]           | CDKN2B, CDKN2B-AS1 | Acute lymphoblastic leukemia (childhood)                     | 9:22006274  |
| rs4982731- <b>&lt;b&gt;C&lt;/b&gt;</b> | 9 x 10 <sup>-12</sup> |                                          | 0.28 | 1.36      | '-   | [1.24-1.48]    | CEBPE, LMLN2       | Acute lymphoblastic leukemia (childhood)                     | 14:23116124 |
| rs6428370- <b>&lt;b&gt;G&lt;/b&gt;</b> | 7 x 10 <sup>-6</sup>  |                                          | 0.32 | 1.43      | '-   | [1.20-1.60]    | CFHR4, CFHR1       | Acute lymphoblastic leukemia (childhood)                     | 1:196875463 |
| rs920590- <b>&lt;b&gt;C&lt;/b&gt;</b>  | 6 x 10 <sup>-9</sup>  | (ETV6-RUNX1 positive, Northern European) | 0.31 | '-        | '-   | '-             | CSGALNACT1, INTS10 | Acute lymphoblastic leukemia (childhood)                     | 8:19793650  |
| rs920590- <b>&lt;b&gt;C&lt;/b&gt;</b>  | 2 x 10 <sup>-6</sup>  | (ETV6-RUNX1 positive)                    | 0.31 | 1.19      | '-   | [1.07 - 1.33 ] | CSGALNACT1, INTS10 | Acute lymphoblastic leukemia (childhood)                     | 8:19793650  |
| rs2167364- <b>&lt;b&gt;G&lt;/b&gt;</b> | 2 x 10 <sup>-8</sup>  |                                          | 0.31 | 1.32      | '-   | [1.20 - 1.45]  | DDC, FIGNL1        | Acute lymphoblastic leukemia (childhood)                     | 7:50498129  |
| rs2167364- <b>&lt;b&gt;G&lt;/b&gt;</b> | 2 x 10 <sup>-7</sup>  | (ETV6-RUNX1 positive)                    | 0.31 | 1.32      | '-   | [1.19 - 1.46]  | DDC, FIGNL1        | Acute lymphoblastic leukemia (childhood)                     | 7:50498129  |

| Variant and risk allele | P-value               | P-value annotation                       | RAF  | OR   | Beta | CI          | Mapped gene | Reported trait                                                          | Location    |
|-------------------------|-----------------------|------------------------------------------|------|------|------|-------------|-------------|-------------------------------------------------------------------------|-------------|
| rs4762284-<b>T</b>      | 8 x 10 <sup>-9</sup>  |                                          | 0.3  | 1.19 | '-   | [1.12–1.26] | ELK3        | Acute lymphoblastic leukemia in childhood (B cell precursor)            | 12:96218984 |
| rs4762284-<b>?</b>      | 3 x 10 <sup>-7</sup>  |                                          | NR   | 1.21 | '-   | [1.12-1.30] | ELK3        | Acute lymphoblastic leukemia in childhood (B cell precursor)            | 12:96218984 |
| rs4762284-<b>T</b>      | 4 x 10 <sup>-7</sup>  |                                          | 0.32 | 1.15 | '-   | [1.12-1.19] | ELK3        | B-cell acute lymphoblastic leukaemia                                    | 12:96218984 |
| rs6445754-<b>C</b>      | 5 x 10 <sup>-6</sup>  | (ETV6-RUNX1 positive, Northern European) | 0.22 | '-   | '-   | '-          | ERC2        | Acute lymphoblastic leukemia (childhood)                                | 3:55773227  |
| rs9976326-<b>T</b>      | 5 x 10 <sup>-9</sup>  |                                          | 0.25 | 1.33 | '-   | [1.21-1.46] | ERG         | B-cell acute lymphoblastic leukaemia (high-hyperdiploidy)               | 21:38404563 |
| rs9976326-<b>T</b>      | 1 x 10 <sup>-8</sup>  |                                          | 0.25 | 1.19 | '-   | [1.12-1.26] | ERG         | B-cell acute lymphoblastic leukaemia                                    | 21:38404563 |
| rs3824662-<b>A</b>      | 4 x 10 <sup>-14</sup> |                                          | 0.19 | 1.29 | '-   | [1.21-1.38] | GATA3       | B-cell acute lymphoblastic leukaemia                                    | 10:8062245  |
| rs3824662-<b>A</b>      | 3 x 10 <sup>-13</sup> |                                          | 0.2  | '-   | '-   | '-          | GATA3       | B cell acute lymphoblastic leukaemia (hyperdiploid negative)            | 10:8062245  |
| rs3824662-<b>A</b>      | 3 x 10 <sup>-13</sup> |                                          | 0.2  | 1.9  | '-   | [1.3-2.7]   | GATA3       | Acute lymphoblastic leukemia (B-cell precursor)                         | 10:8062245  |
| rs3824662-<b>A</b>      | 1 x 10 <sup>-12</sup> |                                          | 0.2  | '-   | '-   | '-          | GATA3       | B cell acute lymphoblastic leukaemia (Philadelphia chromosome negative) | 10:8062245  |

| Variant and risk allele | P-value               | P-value annotation    | RAF  | OR        | Beta | CI          | Mapped gene   | Reported trait                                               | Location    |
|-------------------------|-----------------------|-----------------------|------|-----------|------|-------------|---------------|--------------------------------------------------------------|-------------|
| rs3824662-<b>T</b>      | 9 x 10 <sup>-12</sup> |                       | 0.17 | 1.31      | '-   | [1.21-1.41] | GATA3         | Acute lymphoblastic leukemia (B-cell precursor)              | 10:8062245  |
| rs3824662-<b>?</b>      | 2 x 10 <sup>-10</sup> |                       | NR   | 1.34      | '-   | [1.22-1.47] | GATA3         | Acute lymphoblastic leukemia in childhood (B cell precursor) | 10:8062245  |
| rs3824662-<b>A</b>      | 3 x 10 <sup>-10</sup> |                       | 0.20 | 1.77      | '-   | [1.48-2.12] | GATA3         | Acute lymphoblastic leukemia (adolescents and young adults)  | 10:8062245  |
| rs3824662-<b>A</b>      | 1 x 10 <sup>-8</sup>  |                       | 0.2  | '-        | '-   | '-          | GATA3         | B cell acute lymphoblastic leukaemia (normal cytogenetics)   | 10:8062245  |
| rs3824662-<b>A</b>      | 2 x 10 <sup>-7</sup>  |                       | 0.2  | '-        | '-   | '-          | GATA3         | B cell acute lymphoblastic leukaemia (abnormal cytogenetics) | 10:8062245  |
| rs3824662-<b>A</b>      | 2 x 10 <sup>-7</sup>  |                       | 0.2  | 2.2       | '-   | [1.1-4.0]   | GATA3         | B cell acute lymphoblastic leukaemia in adulthood            | 10:8062245  |
| rs3824662-<b>A</b>      | 6 x 10 <sup>-6</sup>  |                       | 0.2  | 1.9       | '-   | [1.1-3.3]   | GATA3         | B cell acute lymphoblastic leukaemia in young adulthood      | 10:8062245  |
| rs1881797-<b>C</b>      | 7 x 10 <sup>-6</sup>  |                       | 0.18 | 1.52      | '-   | [1.20-1.80] | GCSAML, OR2C3 | Acute lymphoblastic leukemia (childhood)                     | 1:247526230 |
| rs7156960-<b>C</b>      | 1 x 10 <sup>-6</sup>  | (ETV6-RUNX1 positive) | 0.52 | 1.2048193 | '-   | [1.09-1.33] | GPATCH2L      | Acute lymphoblastic leukemia (childhood)                     | 14:76237008 |
| rs7156960-<b>C</b>      | 3 x 10 <sup>-6</sup>  |                       | 0.53 | 1.2195122 | '-   | [1.12-1.33] | GPATCH2L      | Acute lymphoblastic leukemia (childhood)                     | 14:76237008 |
| rs7156960-<b>G</b>      | 4 x 10 <sup>-6</sup>  | (ETV6-RUNX1 positive, | 0.48 | '-        | '-   | '-          | GPATCH2L      | Acute lymphoblastic leukemia (childhood)                     | 14:76237008 |

| Variant and risk allele | P-value               | P-value annotation    | RAF  | OR   | Beta | CI            | Mapped gene | Reported trait                                                          | Location    |
|-------------------------|-----------------------|-----------------------|------|------|------|---------------|-------------|-------------------------------------------------------------------------|-------------|
|                         |                       | Northern European)    |      |      |      |               |             |                                                                         |             |
| rs2290400- <b>T</b>     | 1 x 10 <sup>-9</sup>  |                       | NR   | 1.17 | '-   | [1.11-1.23]   | GSDMB       | Acute lymphoblastic leukemia (childhood)                                | 17:39909987 |
| rs4132601- <b>?</b>     | 6 x 10 <sup>-55</sup> |                       | NR   | 1.75 | '-   | [1.63-1.88]   | IKZF1       | Acute lymphoblastic leukemia in childhood (B cell precursor)            | 7:50402906  |
| rs11980379- <b>?</b>    | 3 x 10 <sup>-33</sup> |                       | NR   | '-   | '-   | '-            | IKZF1       | Acute lymphoblastic leukemia (B-cell precursor)                         | 7:50402283  |
| rs11978267- <b>A</b>    | 2 x 10 <sup>-29</sup> |                       | NR   | 1.43 | '-   | [NR]          | IKZF1       | Acute lymphoblastic leukemia (childhood)                                | 7:50398606  |
| rs4132601- <b>C</b>     | 1 x 10 <sup>-19</sup> |                       | 0.28 | 1.69 | '-   | [1.58-1.81]   | IKZF1       | Acute lymphoblastic leukemia (childhood)                                | 7:50402906  |
| rs4132601- <b>G</b>     | 8 x 10 <sup>-13</sup> |                       | 0.27 | 1.43 | '-   | [1.30 - 1.58] | IKZF1       | Acute lymphoblastic leukemia (childhood)                                | 7:50402906  |
| rs11978267- <b>G</b>    | 8 x 10 <sup>-11</sup> |                       | 0.27 | 1.69 | '-   | [1.40-1.90]   | IKZF1       | Acute lymphoblastic leukemia (childhood)                                | 7:50398606  |
| rs11978267- <b>G</b>    | 9 x 10 <sup>-11</sup> | (ETV6-RUNX1 positive) | 0.27 | 1.43 | '-   | [1.28 - 1.59] | IKZF1       | Acute lymphoblastic leukemia (childhood)                                | 7:50398606  |
| rs11980379- <b>C</b>    | 1 x 10 <sup>-9</sup>  |                       | 0.3  | 2.3  | '-   | [1.5-3.7]     | IKZF1       | Acute lymphoblastic leukemia in childhood (B cell precursor)            | 7:50402283  |
| rs11980379- <b>C</b>    | 4 x 10 <sup>-9</sup>  |                       | 0.3  | '-   | '-   | '-            | IKZF1       | B cell acute lymphoblastic leukaemia (Philadelphia chromosome negative) | 7:50402283  |
| rs11980379- <b>C</b>    | 4 x 10 <sup>-8</sup>  | (males)               | NR   | 1.8  | '-   | [1.2-2.5]     | IKZF1       | Acute lymphoblastic leukemia (B-cell precursor)                         | 7:50402283  |

| Variant and risk allele | P-value               | P-value annotation | RAF  | OR        | Beta | CI          | Mapped gene        | Reported trait                                               | Location     |
|-------------------------|-----------------------|--------------------|------|-----------|------|-------------|--------------------|--------------------------------------------------------------|--------------|
| rs11980379- <b>C</b>    | 5 x 10 <sup>-8</sup>  |                    | 0.3  | '-        | '-   | '-          | IKZF1              | B cell acute lymphoblastic leukaemia (normal cytogenetics)   | 7:50402283   |
| rs11980379- <b>C</b>    | 7 x 10 <sup>-8</sup>  |                    | 0.3  | 1.5       | '-   | [1.2-2.0]   | IKZF1              | Acute lymphoblastic leukemia (B-cell precursor)              | 7:50402283   |
| rs11980379- <b>C</b>    | 3 x 10 <sup>-7</sup>  |                    | 0.3  | '-        | '-   | '-          | IKZF1              | B cell acute lymphoblastic leukaemia (hyperdiploid negative) | 7:50402283   |
| rs1110701- <b>G</b>     | 7 x 10 <sup>-9</sup>  |                    | 0.28 | 1.69      | '-   | [1.42–2.02] | IKZF1, RNU6-1091P  | Acute lymphoblastic leukemia (childhood)                     | 7:50410929   |
| rs73956024- <b>?</b>    | 4 x 10 <sup>-6</sup>  |                    | NR   | 3.11      | '-   | [1.93-5.04] | ISCA1P6, RNA5SP103 | Acute lymphoblastic leukemia (adult vs childhood)            | 2:128513332  |
| rs12621643- <b>T</b>    | 3 x 10 <sup>-6</sup>  |                    | 0.28 | 1.48      | '-   | [1.20-1.70] | KCNE4              | Acute lymphoblastic leukemia (childhood)                     | 2:223053265  |
| rs9290663- <b>T</b>     | 6 x 10 <sup>-6</sup>  |                    | 0.13 | 1.58      | '-   | [1.20-1.90] | KCNMB2, KCNMB2-AS1 | Acute lymphoblastic leukemia (childhood)                     | 3:178712151  |
| rs10018622- <b>?</b>    | 4 x 10 <sup>-6</sup>  |                    | 0.24 | 1.9607843 | '-   | [1.45-2.63] | KLHL5, WDR19       | Acute lymphoblastic leukemia (childhood)                     | 4:39133944   |
| rs12779301- <b>C</b>    | 6 x 10 <sup>-13</sup> |                    | 0.66 | 1.22      | '-   | [1.15-1.29] | LHPP               | B-cell acute lymphoblastic leukaemia                         | 10:124604086 |
| rs35837782- <b>G</b>    | 1 x 10 <sup>-11</sup> |                    | 0.62 | 1.21      | '-   | [1.15–1.28] | LHPP               | Acute lymphoblastic leukemia in childhood (B cell precursor) | 10:124604740 |
| rs35837782- <b>?</b>    | 9 x 10 <sup>-11</sup> |                    | NR   | 1.26      | '-   | [1.18-1.35] | LHPP               | Acute lymphoblastic leukemia in childhood (B cell precursor) | 10:124604740 |
| rs3740540- <b>C</b>     | 6 x 10 <sup>-6</sup>  |                    | NR   | 1.16      | '-   | [NR]        | LHPP               | Acute lymphoblastic leukemia (childhood)                     | 10:124605598 |



| Variant and risk allele | P-value               | P-value annotation                       | RAF   | OR        | Beta | CI          | Mapped gene     | Reported trait                           | Location     |
|-------------------------|-----------------------|------------------------------------------|-------|-----------|------|-------------|-----------------|------------------------------------------|--------------|
| rs1496766-<b>C</b>      | 5 x 10 <sup>-6</sup>  |                                          | 0.014 | 2.84      | '-   | [1.81-4.44] | MAGI2           | Acute lymphoblastic leukemia (childhood) | 7:78702149   |
| rs2089222-<b>A</b>      | 8 x 10 <sup>-8</sup>  |                                          | 0.03  | 2.26      | '-   | [1.60-3.0]  | MAP1LC3B2       | Acute lymphoblastic leukemia (childhood) | 12:116564853 |
| rs1879352-<b>C</b>      | 9 x 10 <sup>-6</sup>  |                                          | 0.16  | 1.53      | '-   | [1.20-1.80] | METTL4          | Acute lymphoblastic leukemia (childhood) | 18:2498055   |
| rs7578361-<b>C</b>      | 8 x 10 <sup>-6</sup>  |                                          | 0.276 | 1.4       | '-   | [1.21-1.63] | MMADHC, LYPD6   | Acute lymphoblastic leukemia (childhood) | 2:149540704  |
| rs10170236-<b>C</b>     | 4 x 10 <sup>-6</sup>  |                                          | 0.256 | 1.45      | '-   | [1.24-1.69] | MMADHC-DT       | Acute lymphoblastic leukemia (childhood) | 2:149601110  |
| rs17079534-<b>A</b>     | 2 x 10 <sup>-7</sup>  |                                          | 0.005 | 4.07      | '-   | [2.40-6.87] | MYRIP           | Acute lymphoblastic leukemia (childhood) | 3:39805581   |
| rs41322152-<b>C</b>     | 8 x 10 <sup>-6</sup>  |                                          | 0.012 | 2.52      | '-   | [1.68-3.79] | NPFFR1          | Acute lymphoblastic leukemia (childhood) | 10:70281049  |
| rs1945213-<b>C</b>      | 9 x 10 <sup>-11</sup> | (ETV6-RUNX1 positive, Northern European) | 0.31  | '-        | '-   | '-          | OR5AL1, OR5AL2P | Acute lymphoblastic leukemia (childhood) | 11:56408195  |
| rs1945213-<b>G</b>      | 3 x 10 <sup>-8</sup>  |                                          | 0.69  | 1.2987013 | '-   | [1.19-1.43] | OR5AL1, OR5AL2P | Acute lymphoblastic leukemia (childhood) | 11:56408195  |
| rs1945213-<b>G</b>      | 4 x 10 <sup>-8</sup>  | (ETV6-RUNX1 positive)                    | 0.69  | 1.2820514 | '-   | [1.14-1.45] | OR5AL1, OR5AL2P | Acute lymphoblastic leukemia (childhood) | 11:56408195  |
| rs563507-<b>A</b>       | 9 x 10 <sup>-6</sup>  |                                          | 0.04  | 2         | '-   | [1.40-2.70] | PARD3           | Acute lymphoblastic leukemia (childhood) | 10:34529060  |

| Variant and risk allele | P-value               | P-value annotation                       | RAF   | OR        | Beta | CI          | Mapped gene | Reported trait                                               | Location    |
|-------------------------|-----------------------|------------------------------------------|-------|-----------|------|-------------|-------------|--------------------------------------------------------------|-------------|
| rs6683977- <b>C</b>     | 5 x 10 <sup>-6</sup>  |                                          | 0.449 | 1.41      | '-   | [1.22-1.64] | PDE4B       | Acute lymphoblastic leukemia (childhood)                     | 1:66303417  |
| rs17423910- <b>G</b>    | 6 x 10 <sup>-6</sup>  | (ETV6-RUNX1 positive, Northern European) | 0.17  | '-        | '-   | '-          | PDE4B       | Acute lymphoblastic leukemia (childhood)                     | 1:66223426  |
| rs546784- <b>A</b>      | 9 x 10 <sup>-6</sup>  |                                          | 0.457 | 1.4       | '-   | [1.20-1.62] | PDE4B       | Acute lymphoblastic leukemia (childhood)                     | 1:66296783  |
| rs4748813- <b>T</b>     | 3 x 10 <sup>-20</sup> |                                          | NR    | 1.3513513 | '-   | [NR]        | PIP4K2A     | Acute lymphoblastic leukemia (childhood)                     | 10:22557806 |
| rs2296624- <b>C</b>     | 3 x 10 <sup>-15</sup> |                                          | 0.67  | 1.25      | '-   | [1.18-1.32] | PIP4K2A     | B-cell acute lymphoblastic leukaemia                         | 10:22568017 |
| rs10828317- <b>?</b>    | 2 x 10 <sup>-10</sup> |                                          | NR    | 1.2658228 | '-   | [0.73-0.84] | PIP4K2A     | Acute lymphoblastic leukemia in childhood (B cell precursor) | 10:22550699 |
| rs10828317- <b>T</b>    | 2 x 10 <sup>-9</sup>  |                                          | 0.68  | 1.23      | '-   | [1.15-1.32] | PIP4K2A     | Acute lymphoblastic leukemia (B-cell precursor)              | 10:22550699 |
| rs3942852- <b>C</b>     | 5 x 10 <sup>-7</sup>  | (ETV6-RUNX1 positive, Northern European) | 0.22  | '-        | '-   | '-          | PTPRJ       | Acute lymphoblastic leukemia (childhood)                     | 11:48093537 |
| rs3942852- <b>T</b>     | 1 x 10 <sup>-6</sup>  | (ETV6-RUNX1 positive)                    | 0.78  | 1.2987013 | '-   | [1.12-1.47] | PTPRJ       | Acute lymphoblastic leukemia (childhood)                     | 11:48093537 |

| Variant and risk allele | P-value               | P-value annotation | RAF   | OR   | Beta | CI          | Mapped gene       | Reported trait                                                          | Location    |
|-------------------------|-----------------------|--------------------|-------|------|------|-------------|-------------------|-------------------------------------------------------------------------|-------------|
| rs7142143-<b>C</b>      | 7 x 10 <sup>-9</sup>  |                    | 0.01  | 3.61 | '-   | [2.34-5.57] | PYGL              | Acute lymphoblastic leukemia (childhood)                                | 14:50936813 |
| rs9958208-<b>A</b>      | 5 x 10 <sup>-6</sup>  |                    | 0.099 | 1.62 | '-   | [1.32-1.99] | RIT2              | Acute lymphoblastic leukemia (childhood)                                | 18:43011119 |
| rs2665658-<b>A</b>      | 2 x 10 <sup>-8</sup>  | (EA)               | 0.35  | 3.98 | '-   | [2.46-6.44] | RN7SL361P, BCL11A | TCF3-PBX1 fusion in childhood acute lymphoblastic leukemia              | 2:60599667  |
| rs2665658-<b>A</b>      | 2 x 10 <sup>-8</sup>  | (EA)               | 0.37  | 4    | '-   | [2.47-6.49] | RN7SL361P, BCL11A | Childhood acute lymphoblastic leukemia (TCF3-PBX1 fusion)               | 2:60599667  |
| rs17133805-<b>G</b>     | 5 x 10 <sup>-71</sup> |                    | 0.32  | 1.65 | '-   | [1.56-1.74] | RNU6-1091P, IKZF1 | B-cell acute lymphoblastic leukaemia                                    | 7:50409816  |
| rs6964969-<b>C</b>      | 2 x 10 <sup>-29</sup> |                    | 0.28  | 1.67 | '-   | [1.53-1.83] | RNU6-1091P, IKZF1 | Acute lymphoblastic leukemia (childhood)                                | 7:50405553  |
| rs189434316-<b>T</b>    | 6 x 10 <sup>-9</sup>  |                    | 0.07  | 3.7  | '-   | [2.5-6.2]   | RNU6-366P, CPSF2  | B cell acute lymphoblastic leukaemia (normal cytogenetics)              | 14:92231568 |
| rs189434316-<b>T</b>    | 2 x 10 <sup>-6</sup>  |                    | NR    | '-   | '-   | '-          | RNU6-366P, CPSF2  | B cell acute lymphoblastic leukaemia (hyperdiploid negative)            | 14:92231568 |
| rs189434316-<b>T</b>    | 3 x 10 <sup>-6</sup>  |                    | NR    | '-   | '-   | '-          | RNU6-366P, CPSF2  | B cell acute lymphoblastic leukaemia (Philadelphia chromosome negative) | 14:92231568 |
| rs17481869-<b>A</b>     | 2 x 10 <sup>-9</sup>  |                    | 0.08  | 1.74 | '-   | [1.45-2.09] | RPL6P5            | B-cell acute lymphoblastic leukaemia (ETV6-RUNX1 positive)              | 2:145366886 |
| rs17481869-<b>?</b>     | 5 x 10 <sup>-6</sup>  |                    | 0.07  | 1.32 | '-   | [1.17-1.49] | RPL6P5            | Acute lymphoblastic leukemia in childhood (B cell precursor)            | 2:145366886 |

| Variant and risk allele | P-value               | P-value annotation                       | RAF  | OR        | Beta | CI          | Mapped gene   | Reported trait                                               | Location    |
|-------------------------|-----------------------|------------------------------------------|------|-----------|------|-------------|---------------|--------------------------------------------------------------|-------------|
| rs11155133- <b>G</b>    | 3 x 10 <sup>-7</sup>  |                                          | 0.01 | 3.62      | '-   | [2.10-6.00] | RPS3AP24      | Acute lymphoblastic leukemia (childhood)                     | 6:140848688 |
| rs630662- <b>A</b>      | 2 x 10 <sup>-6</sup>  | (ETV6-RUNX1 positive, Northern European) | 0.29 | '-        | '-   | '-          | RSPO2         | Acute lymphoblastic leukemia (childhood)                     | 8:107960070 |
| rs936094- <b>C</b>      | 1 x 10 <sup>-6</sup>  | (ETV6-RUNX1 positive, Northern European) | 0.17 | '-        | '-   | '-          | RXFP1         | Acute lymphoblastic leukemia (childhood)                     | 4:158523162 |
| rs7554607- <b>A</b>     | 2 x 10 <sup>-6</sup>  |                                          | 0.56 | 1.49      | '-   | [1.20-1.70] | RYR2          | Acute lymphoblastic leukemia (childhood)                     | 1:237103303 |
| rs2239630- <b>A</b>     | 2 x 10 <sup>-21</sup> |                                          | 0.45 | 1.28      | '-   | [1.22-1.35] | SLC7A8, CEBPE | B-cell acute lymphoblastic leukaemia                         | 14:23120140 |
| rs2239633- <b>?</b>     | 1 x 10 <sup>-16</sup> |                                          | NR   | '-        | '-   | '-          | SLC7A8, CEBPE | Acute lymphoblastic leukemia (B-cell precursor)              | 14:23119848 |
| rs2239633- <b>?</b>     | 5 x 10 <sup>-14</sup> |                                          | NR   | 1.369863  | '-   | [1.28-1.45] | SLC7A8, CEBPE | Acute lymphoblastic leukemia in childhood (B cell precursor) | 14:23119848 |
| rs2239633- <b>T</b>     | 7 x 10 <sup>-13</sup> |                                          | NR   | 1.2658228 | '-   | [NR]        | SLC7A8, CEBPE | Acute lymphoblastic leukemia (childhood)                     | 14:23119848 |
| rs2239633- <b>C</b>     | 4 x 10 <sup>-10</sup> |                                          | 0.5  | 1.3513513 | '-   | [1.22-1.47] | SLC7A8, CEBPE | Acute lymphoblastic leukemia (childhood)                     | 14:23119848 |

| Variant and risk allele | P-value              | P-value annotation                       | RAF   | OR        | Beta | CI          | Mapped gene   | Reported trait                           | Location    |
|-------------------------|----------------------|------------------------------------------|-------|-----------|------|-------------|---------------|------------------------------------------|-------------|
| rs2239633-<b>C</b>      | 2 x 10 <sup>-8</sup> | (ETV6-RUNX1 positive)                    | 0.5   | 1.3333333 | '-   | [1.2-1.49]  | SLC7A8, CEBPE | Acute lymphoblastic leukemia (childhood) | 14:23119848 |
| rs2239633-<b>G</b>      | 3 x 10 <sup>-7</sup> |                                          | 0.52  | 1.34      | '-   | [1.22-1.45] | SLC7A8, CEBPE | Acute lymphoblastic leukemia (childhood) | 14:23119848 |
| rs207954-<b>C</b>       | 1 x 10 <sup>-6</sup> | (ETV6-RUNX1 positive)                    | 0.72  | 1.25      | '-   | [1.08-1.43] | SLCO3A1       | Acute lymphoblastic leukemia (childhood) | 15:92114143 |
| rs2390536-<b>A</b>      | 2 x 10 <sup>-8</sup> |                                          | NR    | 1.18      | '-   | [1.11-1.24] | SP4           | Acute lymphoblastic leukemia (childhood) | 7:21445779  |
| rs10873876-<b>T</b>     | 4 x 10 <sup>-6</sup> |                                          | 0.15  | 1.55      | '-   | [1.20-1.80] | ST6GALNAC3    | Acute lymphoblastic leukemia (childhood) | 1:76306643  |
| rs17837497-<b>A</b>     | 2 x 10 <sup>-6</sup> |                                          | 0.016 | 2.34      | '-   | [1.65-3.31] | TBXAS1        | Acute lymphoblastic leukemia (childhood) | 7:140002794 |
| rs10849033-<b>G</b>     | 9 x 10 <sup>-6</sup> |                                          | 0.02  | 2.55      | '-   | [1.60-3.80] | TIGAR         | Acute lymphoblastic leukemia (childhood) | 12:4315956  |
| rs17505102-<b>G</b>     | 9 x 10 <sup>-9</sup> | (ETV6-RUNX1 positive)                    | 0.85  | 1.5873016 | '-   | [1.33-1.92] | TP63          | Acute lymphoblastic leukemia (childhood) | 3:189683987 |
| rs17505102-<b>G</b>     | 2 x 10 <sup>-8</sup> |                                          | 0.85  | 1.4705882 | '-   | [1.28-1.67] | TP63          | Acute lymphoblastic leukemia (childhood) | 3:189683987 |
| rs17505102-<b>C</b>     | 3 x 10 <sup>-8</sup> | (ETV6-RUNX1 positive, Northern European) | 0.15  | '-        | '-   | '-          | TP63          | Acute lymphoblastic leukemia (childhood) | 3:189683987 |

| Variant and risk allele | P-value              | P-value annotation                       | RAF  | OR   | Beta | CI          | Mapped gene  | Reported trait                           | Location    |
|-------------------------|----------------------|------------------------------------------|------|------|------|-------------|--------------|------------------------------------------|-------------|
| rs343604- <b>T</b>      | 1 x 10 <sup>-6</sup> | (ETV6-RUNX1 positive, Northern European) | 0.08 | '-   | '-   | '-          | Y_RNA, KCNA3 | Acute lymphoblastic leukemia (childhood) | 1:110716148 |
| rs2191566- <b>G</b>     | 4 x 10 <sup>-7</sup> |                                          | 0.28 | 1.52 | '-   | [1.20-1.70] | ZNF230       | Acute lymphoblastic leukemia (childhood) | 19:44007237 |
